# Supplementary material
Source: publisher site journal article supplement (https://www.dovepress.com/article/514799)

Figure S1 Positive examples of emotional pictures


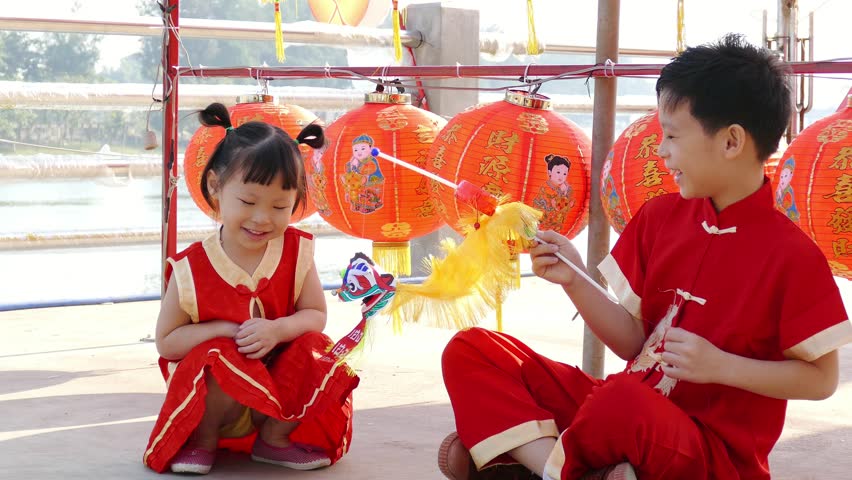

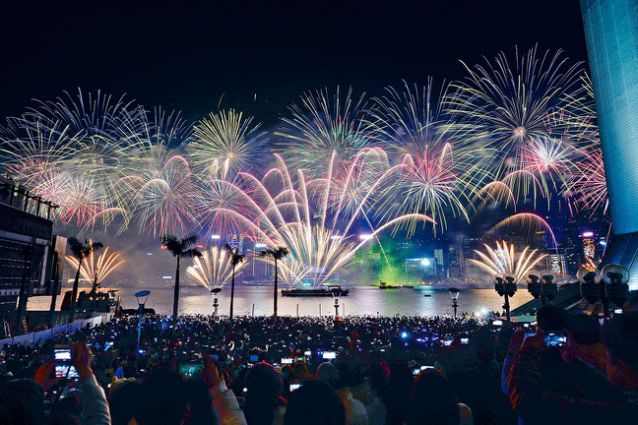


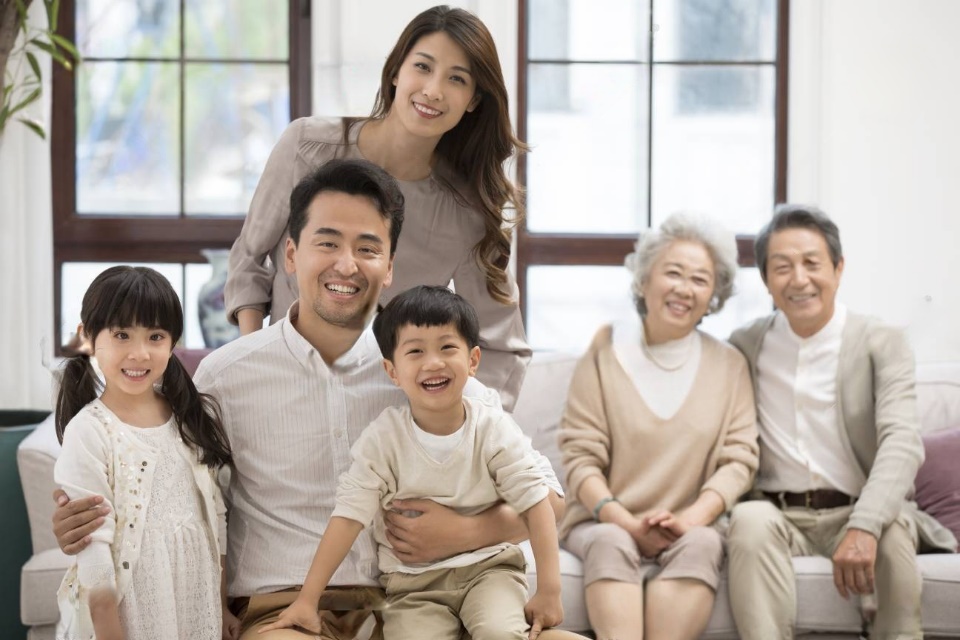


Figure S2 Negative examples of emotional pictures


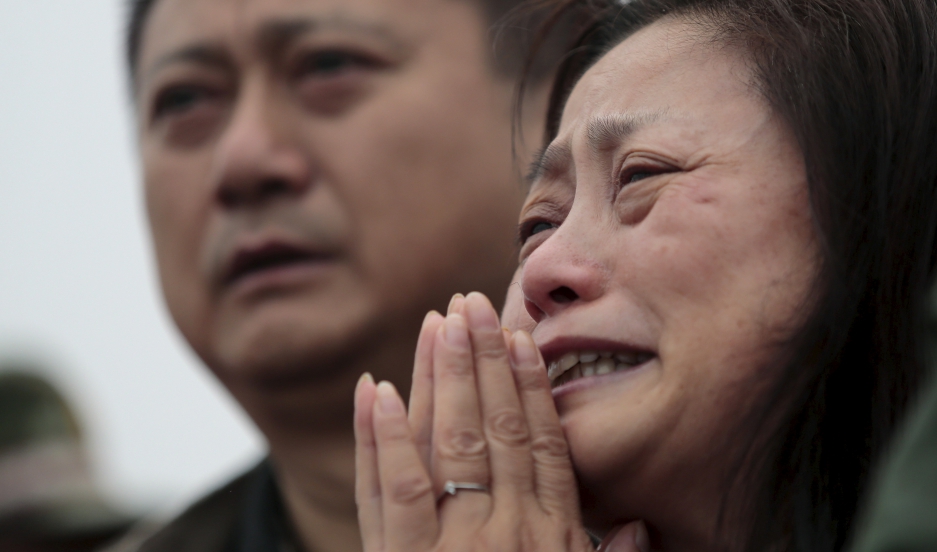


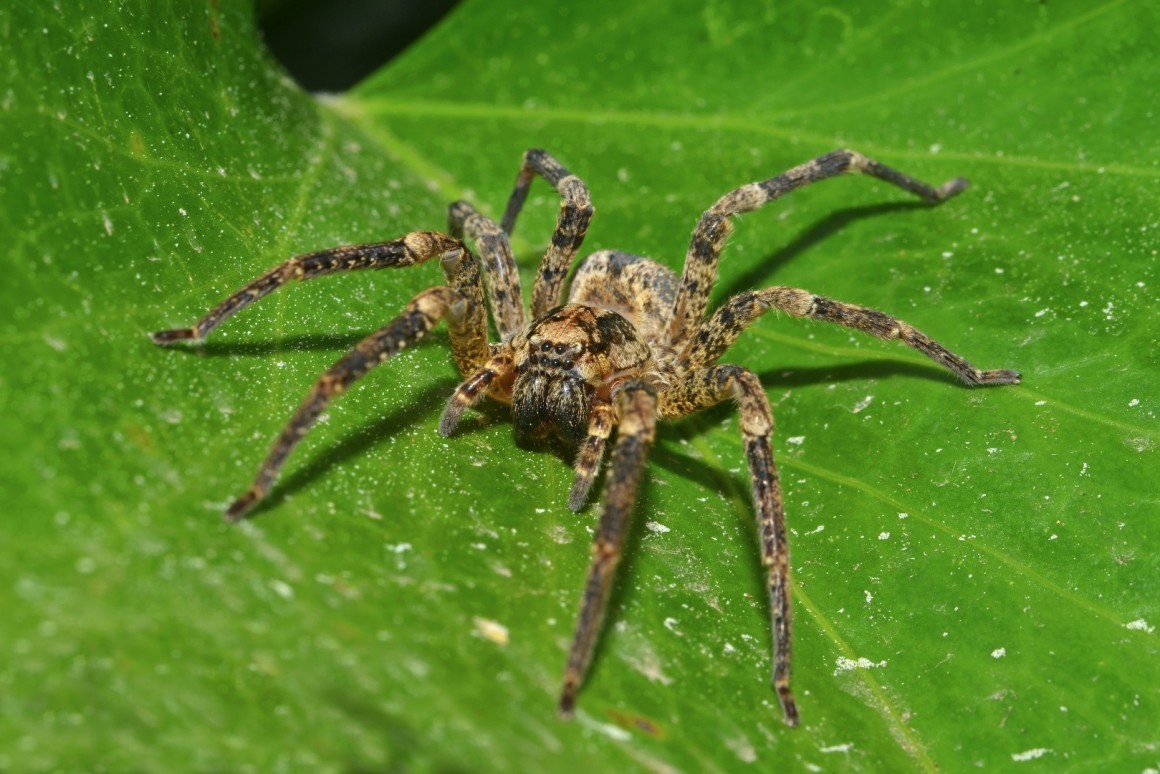


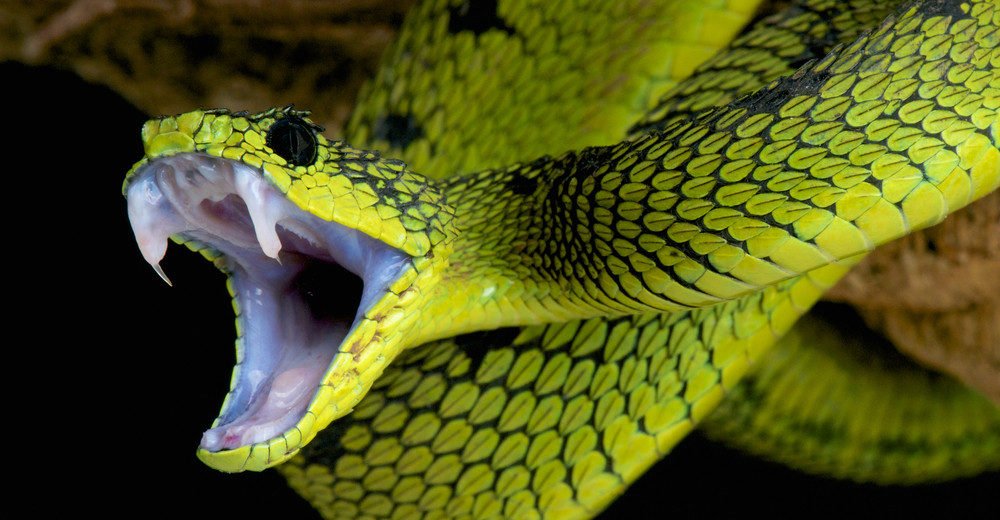


Figure S3: Neutral examples of emotional pictures


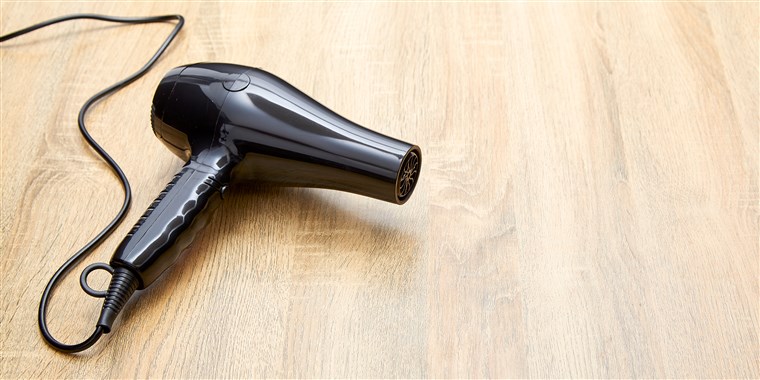


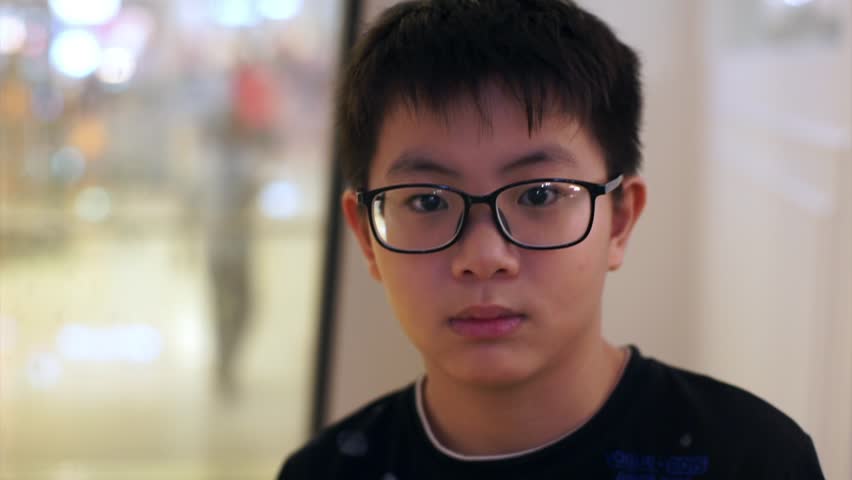


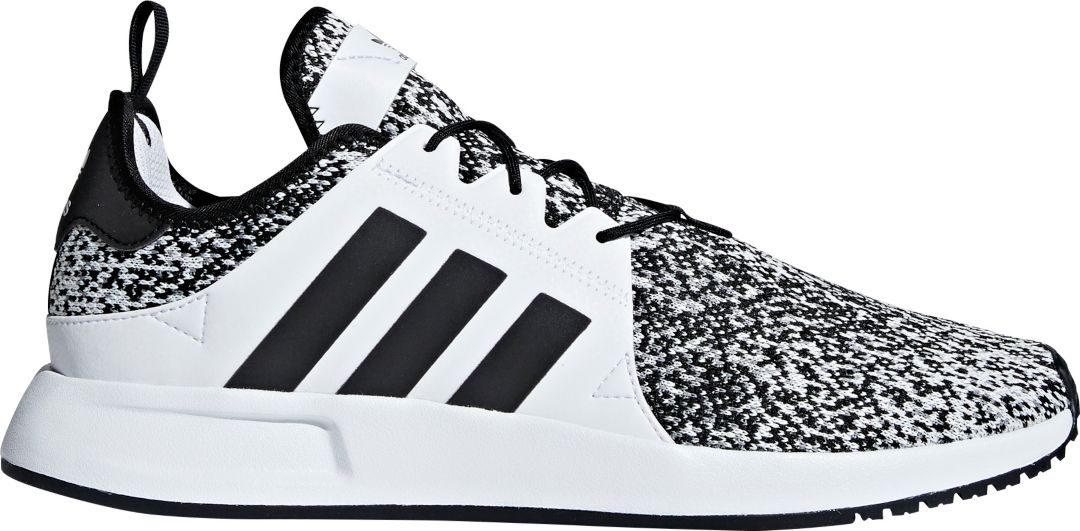

Supplement: Supplementary file 1 [file Supplementary%20Figures%201-3_1.docx]
